# Supplementary material for: Elucidation of How Cancer Cells Avoid Acidosis through Comparative Transcriptomic Data Analysis
Source: PubMed Central journal article supplement (PMC3743895; doi:10.1371/journal.pone.0071177), 2013-08-14
Supplement: pone.0071177.s001.pdf [file pone.0071177.s001.pdf]

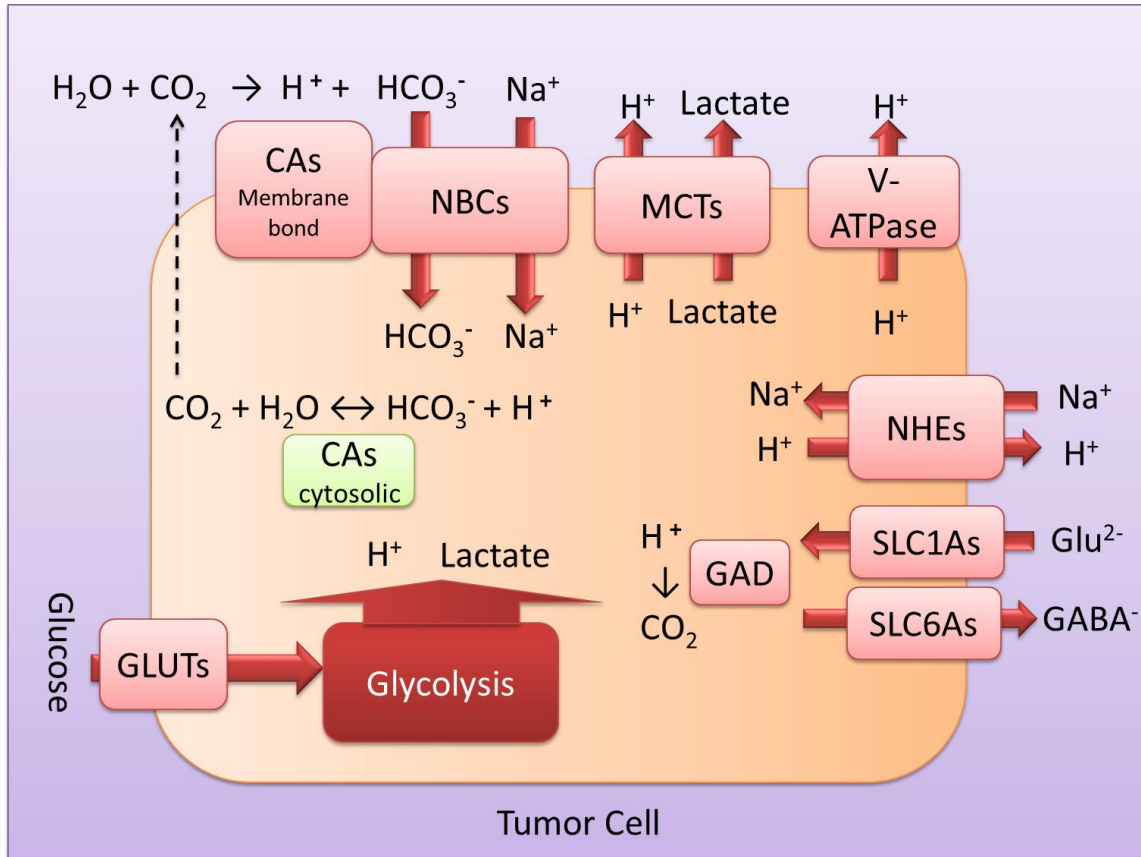

**Figure S1:** Deacidification mechanisms in cancer cells. Each rectangle bar represents a transporter, enzyme or pump family. The red colored rectangles are up-regulated in our study and the green show down-regulation. Dashed arrows indicate CO<sub>2</sub> diffusion across the membrane.
